# Supplementary material for: Environmental exposures contribute to respiratory and allergic symptoms among women living in the banana growing regions of Costa Rica
Source: PubMed Central journal article supplement — Occup Environ Med. 2021 Dec 30;79(7):469–76. doi: 10.1136/oemed-2021-107611 (PMC9198003; doi:10.1136/oemed-2021-107611), 2021-12-30
Supplement: NIHMS1766428-supplement-Supp1.pdf [file NIHMS1766428-supplement-Supp1.pdf]

Supplement

**Table S1. Urinary metabolites of pesticide and polycyclic aromatic hydrocarbon exposures (µg/L)**

| Metabolites                             | LOD  | Historic (n=266)  |       |                  |        |                            | Current (n=259)   |       |                  |        |                            |
|-----------------------------------------|------|-------------------|-------|------------------|--------|----------------------------|-------------------|-------|------------------|--------|----------------------------|
|                                         |      | Detected<br>n (%) | Min   | 75 <sup>th</sup> | Max    | Highly<br>exposed<br>count | Detected<br>n (%) | Min   | 75 <sup>th</sup> | Max    | Highly<br>exposed<br>count |
| <b>Pesticides</b>                       |      |                   |       |                  |        |                            |                   |       |                  |        |                            |
| ETU                                     | 0.08 | 266 (100)         | 0.059 | 4.341            | 107.67 | 68                         | 256 (99)          | 0.079 | 3.519            | 57.71  | 70                         |
| TCP                                     | 0.05 | 266 (100)         | 0.176 | 2.469            | 62.96  | 66                         | 258 (99.6)        | 0.060 | 2.360            | 16.41  | 63                         |
| 2,4-D                                   | 0.02 | 266 (100)         | 0.040 | 0.490            | 159.21 | 62                         | 257 (99)          | 0.005 | 0.405            | 39.41  | 65                         |
| OHP                                     | 0.06 | 264 (99)          | 0.018 | 0.844            | 946.36 | 64                         | 238 (92)          | 0.024 | 0.848            | 20.97  | 66                         |
| OHT                                     | 0.03 | 265 (99.6)        | 0.007 | 0.306            | 677.83 | 62                         | 186 (72)          | 0.009 | 0.387            | 299.96 | 70                         |
| 3PBA                                    | 0.03 | 266 (100)         | 0.046 | 1.578            | 32.61  | 65                         | 259 (100)         | 0.105 | 2.431            | 41.37  | 65                         |
| DCCA                                    | 0.04 | 266 (100)         | 0.076 | 2.169            | 45.77  | 65                         | 259 (100)         | 0.128 | 3.190            | 30.32  | 65                         |
| Pyrethroid                              | 0.03 | 266 (100)         | 0.165 | 3.794            | 78.38  | 67                         | 259 (100)         | 0.233 | 5.462            | 52.24  | 64                         |
| <b>Polycyclic aromatic hydrocarbons</b> |      |                   |       |                  |        |                            |                   |       |                  |        |                            |
| 1-HP                                    | 0.05 | -                 | -     | -                | -      | -                          | 253 (97.7)        | 0.020 | 0.670            | 18.22  | 71                         |
| 2-OH-PH                                 | 0.05 | -                 | -     | -                | -      | -                          | 243 (93.92)       | 0.030 | 0.550            | 39.96  | 62                         |

Abbreviations: ETU=ethylenethiourea, TCP=3,5,6-trichloro-2-pyridinol, OHP= hydroxypyrimethanil, OHT=5-hydroxythiabenzazole, 3PBA=3-phenoxybenzoic acid, DCCA=3-(2,2-dichlorovinyl)-2,2-dimethylcyclopropanecarboxylic acid, 1-HP=1-hydroxypyrene, 2-OH-PH= hydroxyphenanthrene

**Table S2. Spearman correlation coefficients between urinary metabolites for pesticides and polycyclic aromatic hydrocarbons (PAHs) in women living in Matina County, Costa Rica, 2016-2017 (n=259)**

|            |                         | Pesticides |       |       |        |        |        |        | PAHs                    |       |         |
|------------|-------------------------|------------|-------|-------|--------|--------|--------|--------|-------------------------|-------|---------|
|            |                         | ETU        | TCP   | 2,4-D | OHP    | OHT    | 3PBA   | DCCA   | Pyrethroid <sup>1</sup> | 1-HP  | 2-OH-HP |
| Pesticides | ETU                     | 1          | 0.294 | 0.000 | 0.274  | 0.280  | 0.217  | 0.288  | 0.265                   | 0.274 | 0.270   |
|            | TCP                     |            | 1     | 0.020 | 0.162  | 0.169  | 0.315  | 0.329  | 0.330                   | 0.054 | 0.075   |
|            | 2,4-D                   |            |       | 1     | -0.008 | -0.047 | -0.083 | -0.007 | -0.040                  | 0.102 | 0.143   |
|            | OHP                     |            |       |       | 1      | 0.205  | 0.161  | 0.155  | 0.161                   | 0.071 | 0.138   |
|            | OHT                     |            |       |       |        | 1      | 0.123  | 0.104  | 0.124                   | 0.174 | 0.187   |
|            | 3PBA                    |            |       |       |        |        | 1      | 0.798  | 0.921                   | 0.222 | 0.251   |
|            | DCCA                    |            |       |       |        |        |        | 1      | 0.962                   | 0.287 | 0.293   |
|            | Pyrethroid <sup>1</sup> |            |       |       |        |        |        |        | 1                       | 0.269 | 0.281   |
| PAHs       | 1-HP                    |            |       |       |        |        |        |        |                         | 1     | 0.736   |
|            | 2-OH-HP                 |            |       |       |        |        |        |        |                         |       | 1       |

Abbreviations: PAHs=Polycyclic aromatic hydrocarbons, ETU=ethylenethiourea, TCP=3,5,6-trichloro-2-pyridinol, OHP= hydroxypyrimethanil, OHT=5-hydroxythiabenzazole, 3PBA=3-phenoxybenzoic acid, DCCA=3-(2,2-dichlorovinyl)-2,2-dimethylcyclopropanecarboxylic acid, 1-HP=1-hydroxypyrene, 2-OH-PH= hydroxyphenanthrene

<sup>1</sup>Sum of 3PBA and DCCA

**Table S3. Unadjusted odds ratios (ORs) and adjusted odds ratios (aORs) for respiratory and allergic outcomes with historic pesticides in non-smoking women living in Matina County, Costa Rica, 2010-2015 (n=266)**

| Exposure                | N Exposed | Wheeze (n=43)   |                         |                  |                         | Doctor-diagnosed asthma (n=56) |                         |      |                         | High asthma score (n=98) |                         |      |                         |
|-------------------------|-----------|-----------------|-------------------------|------------------|-------------------------|--------------------------------|-------------------------|------|-------------------------|--------------------------|-------------------------|------|-------------------------|
|                         |           | OR              | 95% Confidence Interval | aOR <sup>1</sup> | 95% Confidence Interval | OR                             | 95% Confidence Interval | aOR  | 95% Confidence Interval | OR                       | 95% Confidence Interval | aOR  | 95% Confidence Interval |
| ETU                     | 68        | 0.74            | (0.32, 1.57)            | 0.74             | (0.31, 1.58)            | 0.66                           | (0.30, 1.32)            | 0.65 | (0.30, 1.32)            | 0.64                     | (0.35, 1.15)            | 0.64 | (0.34, 1.15)            |
| TCP                     | 66        | 0.44            | (0.16, 1.03)            | 0.43             | (0.16, 1.01)            | 0.79                           | (0.37, 1.56)            | 0.77 | (0.36, 1.55)            | 0.56                     | (0.30, 1.02)            | 0.55 | (0.29, 1.01)            |
| 2,4-D                   | 62        | 0.85            | (0.36, 1.82)            | 0.96             | (0.41, 2.10)            | 0.99                           | (0.48, 1.96)            | 1.14 | (0.54, 2.30)            | 0.84                     | (0.46, 1.52)            | 0.93 | (0.50, 1.71)            |
| OHP                     | 64        | 1.27            | (0.59, 2.60)            | 1.23             | (0.56, 2.54)            | 1.07                           | (0.52, 2.07)            | 1.02 | (0.50, 2.01)            | 1.13                     | (0.63, 2.01)            | 1.10 | (0.60, 1.97)            |
| OHT                     | 62        | 1.16            | (0.53, 2.40)            | 1.20             | (0.54, 2.53)            | 1.13                           | (0.55, 2.19)            | 1.17 | (0.57, 2.31)            | 1.58                     | (0.88, 2.81)            | 1.65 | (0.91, 2.97)            |
| 3PBA                    | 65        | 0.45            | (0.16, 1.05)            | 0.44             | (0.16, 1.04)            | 0.71                           | (0.33, 1.42)            | 0.70 | (0.32, 1.42)            | 0.77                     | (0.42, 1.38)            | 0.76 | (0.41, 1.38)            |
| DCCA                    | 65        | 0.36            | (0.12, 0.88)            | 0.31             | (0.10, 0.77)            | 0.71                           | (0.33, 1.42)            | 0.62 | (0.28, 1.27)            | 1.1                      | (0.61, 1.94)            | 1.00 | (0.55, 1.80)            |
| Pyrethroid <sup>3</sup> | 67        | 0.43            | (0.16, 1.00)            | 0.38             | (0.14, 0.91)            | 0.87                           | (0.42, 1.71)            | 0.79 | (0.38, 1.57)            | 1.12                     | (0.63, 1.97)            | 1.04 | (0.58, 1.85)            |
|                         |           |                 |                         |                  |                         |                                |                         |      |                         |                          |                         |      |                         |
| Exposure                |           | Rhinitis (n=25) |                         |                  |                         | Eczema (n=83)                  |                         |      |                         | Itchy Rash (n=25)        |                         |      |                         |
| ETU                     | 68        | 0.73            | (0.24, 1.91)            | 0.72             | (0.23, 1.88)            | 0.67                           | (0.35, 1.22)            | 0.67 | (0.35, 1.23)            | 1.15                     | (0.43, 2.77)            | 1.16 | (0.43, 2.81)            |
| TCP                     | 66        | 0.72            | (0.23, 1.86)            | 0.72             | (0.23, 1.87)            | 0.64                           | (0.33, 1.18)            | 0.63 | (0.33, 1.17)            | 0.74                     | (0.24, 1.91)            | 0.73 | (0.23, 1.90)            |
| 2,4-D                   | 62        | 1.91            | (0.77, 4.50)            | 1.84             | (0.73, 4.37)            | 0.97                           | (0.51, 1.77)            | 1.01 | (0.53, 1.85)            | 1.04                     | (0.37, 2.60)            | 1.16 | (0.40, 2.93)            |
| OHP                     | 64        | 0.75            | (0.24, 1.95)            | 0.77             | (0.25, 2.01)            | 1.45                           | (0.80, 2.61)            | 1.44 | (0.79, 2.59)            | 1.00                     | (0.35, 2.48)            | 0.96 | (0.34, 2.42)            |
| OHT                     | 62        | 0.44            | (0.10, 1.33)            | 0.43             | (0.10, 1.31)            | 1.17                           | (0.63, 2.13)            | 1.19 | (0.64, 2.16)            | 2.00                     | (0.80, 4.69)            | 2.07 | (0.83, 4.90)            |
| 3PBA                    | 65        | 0.53            | (0.15, 1.47)            | 0.53             | (0.15, 1.48)            | 1.29                           | (0.71, 2.31)            | 1.29 | (0.71, 2.32)            | 1.86                     | (0.75, 4.36)            | 1.87 | (0.75, 4.42)            |
| DCCA                    | 65        | 0.56            | (0.16, 1.54)            | 0.58             | (0.16, 1.63)            | 1.41                           | (0.78, 2.53)            | 1.37 | (0.75, 2.46)            | 1.52                     | (0.59, 3.61)            | 1.41 | (0.55, 3.38)            |
| Pyrethroid <sup>3</sup> | 67        | 0.68            | (0.22, 1.78)            | 0.71             | (0.23, 1.85)            | 1.58                           | (0.88, 2.81)            | 1.54 | (0.86, 2.76)            | 1.77                     | (0.72, 4.16)            | 1.67 | (0.67, 3.95)            |

Abbreviations: ETU=ethylenethiourea, TCP=3,5,6-trichloro-2-pyridinol, OHP= hydroxypyrimethanil, OHT=5-hydroxythiabenzazole, 3PBA=3-phenoxybenzoic acid, DCCA=3-(2,2-dichlorovinyl)-2,2-dimethylcyclopropanecarboxylic acid

<sup>1</sup> Odds ratios adjusted for obesity (BMI≥30)

<sup>2</sup> Dichotomized at the 75<sup>th</sup> percentile

<sup>3</sup> Sum of 3PBA and DCCA



|                                         |    |      |              |      |              |      |              |      |              |      |              |      |              |
|-----------------------------------------|----|------|--------------|------|--------------|------|--------------|------|--------------|------|--------------|------|--------------|
| ETU                                     | 71 | 1.11 | (0.52, 2.22) | 1.06 | (0.49, 2.16) | 1.04 | (0.52, 1.96) | 0.98 | (0.49, 1.90) | 0.84 | (0.48, 1.46) | 0.87 | (0.49, 1.54) |
| TCP                                     | 71 | 0.6  | (0.25, 1.30) | 0.60 | (0.25, 1.31) | 1.59 | (0.84, 2.94) | 1.62 | (0.84, 3.06) | 0.91 | (0.52, 1.58) | 0.87 | (0.49, 1.52) |
| 2,4-D                                   | 71 | 0.71 | (0.31, 1.50) | 0.73 | (0.31, 1.56) | 0.64 | (0.30, 1.26) | 0.65 | (0.30, 1.31) | 0.77 | (0.44, 1.35) | 0.78 | (0.44, 1.37) |
| OHP                                     | 71 | 0.6  | (0.25, 1.30) | 0.63 | (0.26, 1.37) | 0.64 | (0.30, 1.26) | 0.66 | (0.31, 1.33) | 1.35 | (0.78, 2.32) | 1.49 | (0.85, 2.60) |
| OHT                                     | 71 | 1.44 | (0.70, 2.83) | 1.43 | (0.69, 2.88) | 1.29 | (0.67, 2.41) | 1.29 | (0.65, 2.46) | 1.69 | (0.98, 2.92) | 1.89 | (1.08, 3.32) |
| 3PBA                                    | 71 | 0.71 | (0.31, 1.50) | 0.63 | (0.27, 1.35) | 1.59 | (0.84, 2.94) | 1.43 | (0.74, 2.68) | 1.07 | (0.61, 1.84) | 0.97 | (0.55, 1.69) |
| DCCA                                    | 71 | 0.6  | (0.25, 1.30) | 0.57 | (0.23, 1.24) | 0.82 | (0.40, 1.59) | 0.77 | (0.37, 1.51) | 0.71 | (0.40, 1.24) | 0.67 | (0.37, 1.18) |
| Pyrethroid <sup>3</sup>                 | 71 | 0.6  | (0.25, 1.30) | 0.56 | (0.23, 1.22) | 1.04 | (0.52, 1.96) | 0.97 | (0.48, 1.86) | 0.91 | (0.52, 1.58) | 0.84 | (0.47, 1.47) |
| <b>Polycyclic Aromatic Hydrocarbons</b> |    |      |              |      |              |      |              |      |              |      |              |      |              |
| 1-HP                                    | 79 | 0.62 | (0.27, 1.30) | 0.55 | (0.24, 1.19) | 0.85 | (0.43, 1.60) | 0.77 | (0.38, 1.47) | 0.72 | (0.41, 1.24) | 0.68 | (0.38, 1.17) |
| 2-OH-PH                                 | 71 | 0.85 | (0.38, 1.77) | 0.49 | (0.21, 1.07) | 0.91 | (0.45, 1.74) | 0.85 | (0.41, 1.68) | 0.98 | (0.56, 1.71) | 0.97 | (0.54, 1.7)  |

Abbreviations: ETU=ethylenethiourea, TCP=3,5,6-trichloro-2-pyridinol, OHP= hydroxypyrimethanil, OHT=5-hydroxythiabenzazole, 3PBA=3-phenoxybenzoic acid, DCCA=3-(2,2-dichlorovinyl)-2,2-dimethylcyclopropanecarboxylic acid, 1-HP=1-hydroxypyrene, 2-OH-PH=hydroxyphenanthrene

<sup>1</sup> Odds ratios adjusted for obesity (BMI $\geq$ 30)

<sup>2</sup> Dichotomized at the 75<sup>th</sup> percentile

<sup>3</sup> Sum of 3PBA and DCCA

**Table S5. Sensitivity analysis including smokers for unadjusted odds ratios (ORs) and adjusted odds ratios (aORs) for allergic outcomes and environmental exposures in women living in Matina County, Costa Rica, 2010-2015 (n=290)**

| Exposure                                                       | N Exposed | OR   | 95% Confidence Interval | Rhinitis (n=25)  |                         |      |                         | Eczema (n=92) |                         |      |                         | Itchy Rash (n=27) |                         |
|----------------------------------------------------------------|-----------|------|-------------------------|------------------|-------------------------|------|-------------------------|---------------|-------------------------|------|-------------------------|-------------------|-------------------------|
|                                                                |           |      |                         | aOR <sup>1</sup> | 95% Confidence Interval | OR   | 95% Confidence Interval | aOR           | 95% Confidence Interval | OR   | 95% Confidence Interval | aOR               | 95% Confidence Interval |
| <i>Occupational/Residential Exposures (n=290)</i>              |           |      |                         |                  |                         |      |                         |               |                         |      |                         |                   |                         |
| Mother currently works in banana or other agriculture business | 49        | 0.20 | (0.01, 1.02)            | 0.19             | (0.01, 0.93)            | 2.18 | (1.16, 4.09)            | 2.26          | (1.19, 4.27)            | 2.85 | (1.14, 6.71)            | 2.92              | (1.16, 6.97)            |
| Father currently works on banana plantation                    | 135       | 0.21 | (0.06, 0.57)            | 0.20             | (0.06, 0.56)            | 1.28 | (0.77, 2.12)            | 1.27          | (0.76, 2.11)            | 0.92 | (0.40, 2.07)            | 0.87              | (0.38, 1.98)            |
| Father worked in other agriculture business in last 3 years    | 22        | 1.06 | (0.16, 3.98)            | 1.04             | (0.16, 3.94)            | 1.23 | (0.48, 3.00)            | 1.22          | (0.47, 2.97)            | 3.33 | (1.02, 9.43)            | 3.23              | (0.98, 9.22)            |
| Pesticide used inside the home                                 | 148       | 1.42 | (0.60, 3.52)            | 1.36             | (0.57, 3.40)            | 0.99 | (0.60, 1.64)            | 0.95          | (0.57, 1.60)            | 1.14 | (0.50, 2.66)            | 1.06              | (0.46, 2.51)            |
| Government spraying                                            | 162       | 2.37 | (0.96, 6.72)            | 2.43             | (0.97, 6.93)            | 0.96 | (0.57, 1.60)            | 0.98          | (0.58, 1.64)            | 0.76 | (0.33, 1.76)            | 0.79              | (0.34, 1.83)            |
| Smoke from waste Burning                                       |           |      |                         |                  |                         |      |                         |               |                         |      |                         |                   |                         |
| Never                                                          | 48        | ref  |                         | ref              |                         | ref  |                         | ref           |                         | ref  |                         | ref               |                         |
| Some Months/Monthly                                            | 60        | 2.32 | (0.50, 16.41)           | 2.55             | (0.55, 18.15)           | 1.10 | (0.49, 2.51)            | 1.08          | (0.48, 2.46)            | 1.17 | (0.41, 3.48)            | 1.15              | (0.40, 3.42)            |
| Weekly/Daily                                                   | 182       | 2.31 | (0.63, 14.93)           | 2.38             | (0.64, 15.43)           | 1.00 | (0.51, 2.04)            | 1.02          | (0.52, 2.09)            | 0.34 | (0.12, 0.99)            | 0.35              | (0.12, 1.01)            |
|                                                                |           |      |                         |                  |                         |      |                         |               |                         |      |                         |                   |                         |
|                                                                |           |      |                         |                  |                         |      |                         |               |                         |      |                         |                   |                         |
| <i>Current Metabolites<sup>2</sup> (n=282)</i>                 |           |      |                         |                  |                         |      |                         |               |                         |      |                         |                   |                         |
| <b>Pesticides</b>                                              |           |      |                         |                  |                         |      |                         |               |                         |      |                         |                   |                         |
| ETU                                                            | 71        | 0.91 | (0.32, 2.27)            | 0.83             | (0.29, 2.08)            | 0.96 | (0.53, 1.69)            | 0.97          | (0.53, 1.73)            | 1.34 | (0.53, 3.10)            | 1.31              | (0.51, 3.09)            |

|                                         |    |      |              |      |              |      |              |      |              |      |              |      |              |
|-----------------------------------------|----|------|--------------|------|--------------|------|--------------|------|--------------|------|--------------|------|--------------|
| TCP                                     | 71 | 1.81 | (0.73, 4.25) | 1.93 | (0.77, 4.55) | 1.13 | (0.64, 1.99) | 1.11 | (0.62, 1.96) | 0.87 | (0.31, 2.13) | 0.87 | (0.31, 2.13) |
| 2,4-D                                   | 71 | 0.38 | (0.09, 1.14) | 0.38 | (0.09, 1.14) | 0.96 | (0.53, 1.69) | 0.96 | (0.53, 1.70) | 0.87 | (0.31, 2.13) | 0.89 | (0.31, 2.18) |
| OHP                                     | 71 | 1.20 | (0.45, 2.90) | 1.18 | (0.44, 2.87) | 1.04 | (0.58, 1.83) | 1.09 | (0.61, 1.93) | 0.51 | (0.15, 1.38) | 0.53 | (0.15, 1.44) |
| OHT                                     | 71 | 0.43 | (0.10, 1.30) | 0.38 | (0.09, 1.16) | 1.58 | (0.90, 2.75) | 1.65 | (0.93, 2.90) | 1.95 | (0.82, 4.41) | 1.98 | (0.82, 4.57) |
| 3PBA                                    | 71 | 1.81 | (0.73, 4.25) | 1.96 | (0.78, 4.66) | 0.96 | (0.53, 1.69) | 0.91 | (0.50, 1.61) | 1.09 | (0.41, 2.58) | 1.01 | (0.38, 2.42) |
| DCCA                                    | 71 | 1.73 | (0.70, 4.06) | 1.81 | (0.73, 4.28) | 0.88 | (0.48, 1.55) | 0.85 | (0.47, 1.52) | 1.34 | (0.53, 3.10) | 1.30 | (0.51, 3.02) |
| Pyrethroid <sup>3</sup>                 | 71 | 1.48 | (0.58, 3.52) | 1.60 | (0.62, 3.83) | 1.23 | (0.69, 2.16) | 1.19 | (0.67, 2.09) | 1.34 | (0.53, 3.10) | 1.28 | (0.51, 3.00) |
| <b>Polycyclic Aromatic Hydrocarbons</b> |    |      |              |      |              |      |              |      |              |      |              |      |              |
| 1-HP                                    | 79 | 0.82 | (0.29, 2.05) | 0.83 | (0.29, 2.08) | 1.09 | (0.62, 1.89) | 1.06 | (0.60, 1.84) | 1.09 | (0.43, 2.53) | 1.04 | (0.41, 2.42) |
| 2-OH-HP                                 | 71 | 0.56 | (0.16, 1.55) | 0.52 | (0.14, 1.47) | 0.96 | (0.53, 1.71) | 0.93 | (0.51, 1.66) | 1.56 | (0.64, 3.56) | 1.26 | (0.5, 2.96)  |

Abbreviations: ETU=ethylenethiourea, TCP=3,5,6-trichloro-2-pyridinol, OHP= hydroxypyrimethanil, OHT=5-hydroxythiabenzodazole, 3PBA=3-phenoxybenzoic acid, DCCA=3-(2,2-dichlorovinyl)-2,2-dimethylcyclopropanecarboxylic acid, 1-HP=1-hydroxypyrene, 2-OH-HP=hydroxyphenanthrene

<sup>1</sup> Odds ratios adjusted for obesity (BMI≥30)

<sup>2</sup> Dichotomized at the 75<sup>th</sup> percentile

<sup>3</sup> Sum of 3PBA and DCCA

**Figure S1. Study Timeline for 290 women enrolled in ISA Study, Matina County, Costa Rica, 2010-2017**

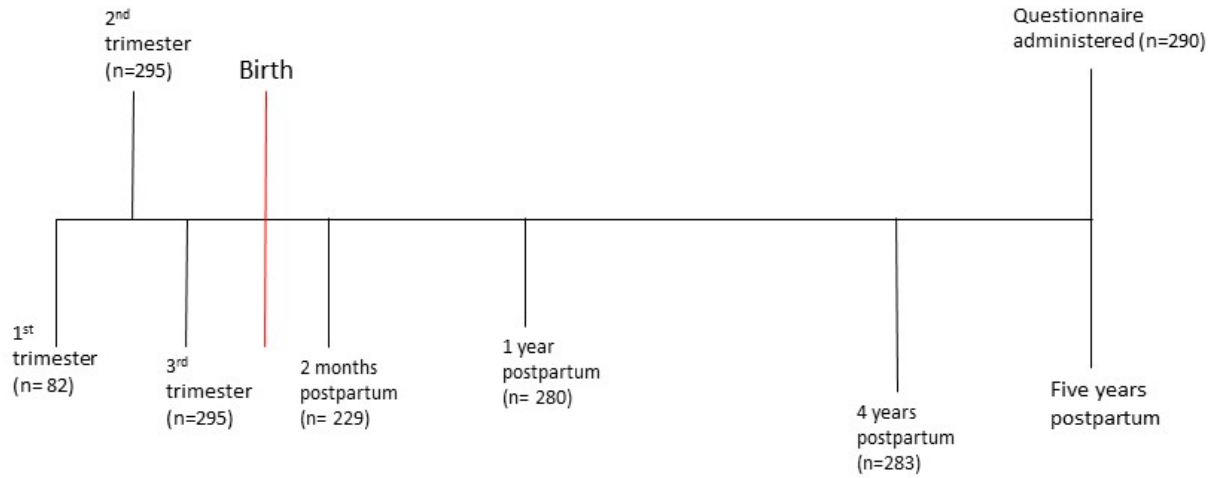

**Figure S2. Exposure distributions for current pesticides**

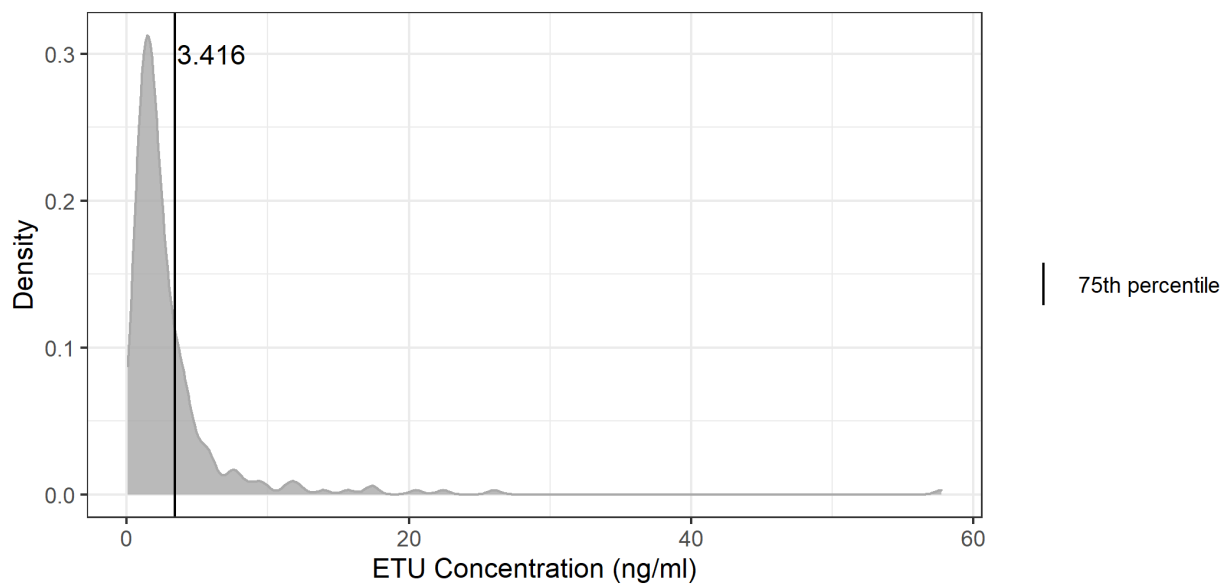



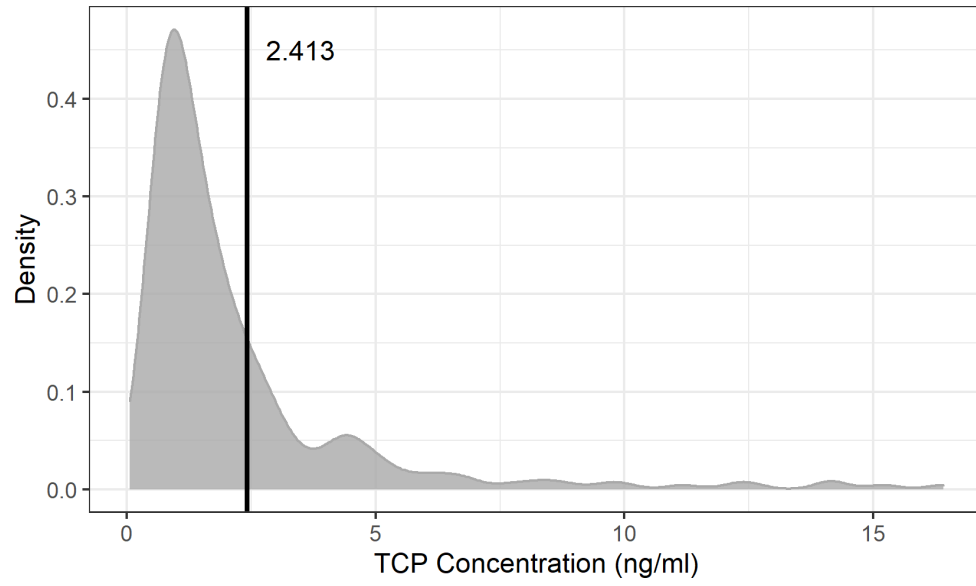

75th percentile

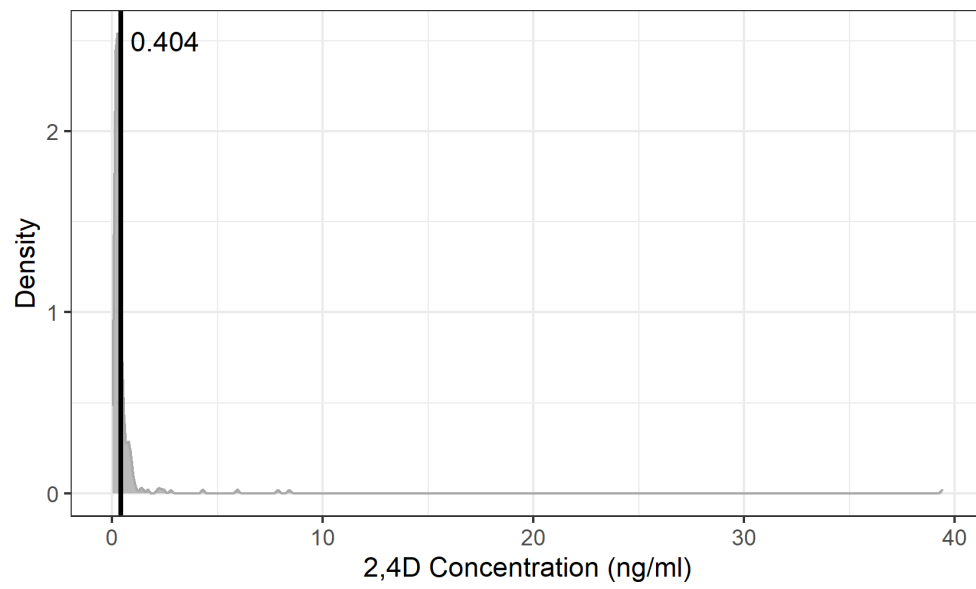

75th percentile

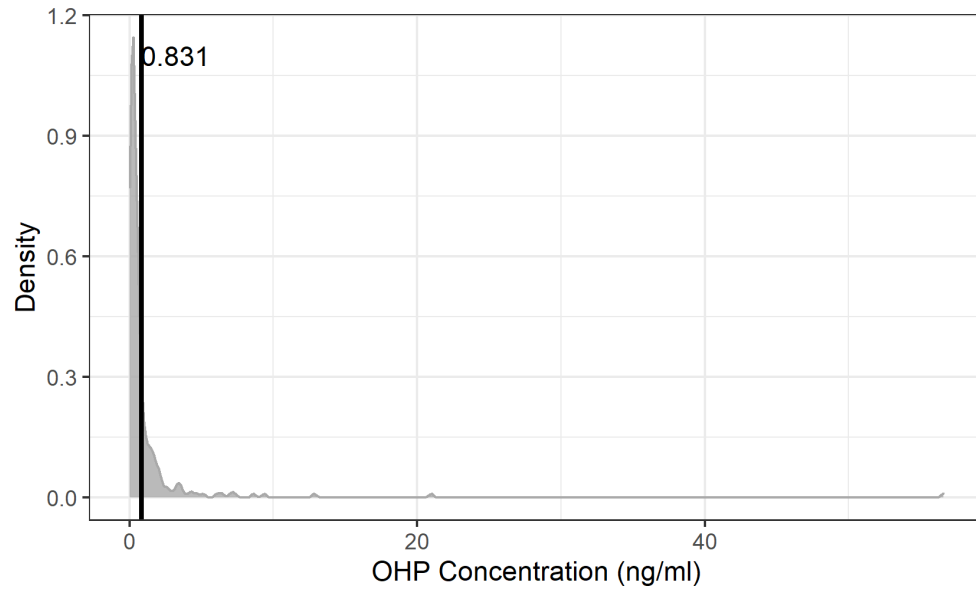

75th percentile

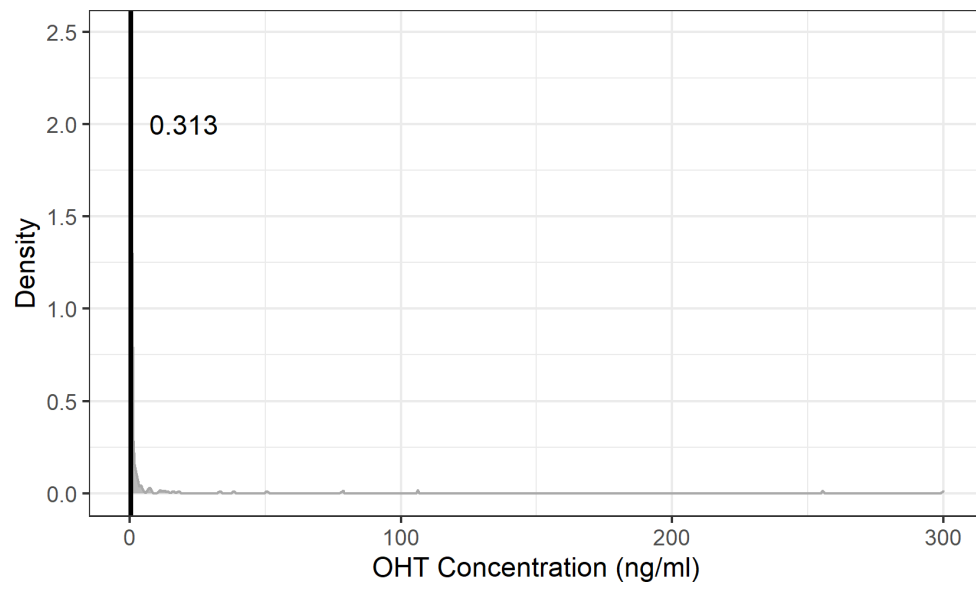

75th percentile

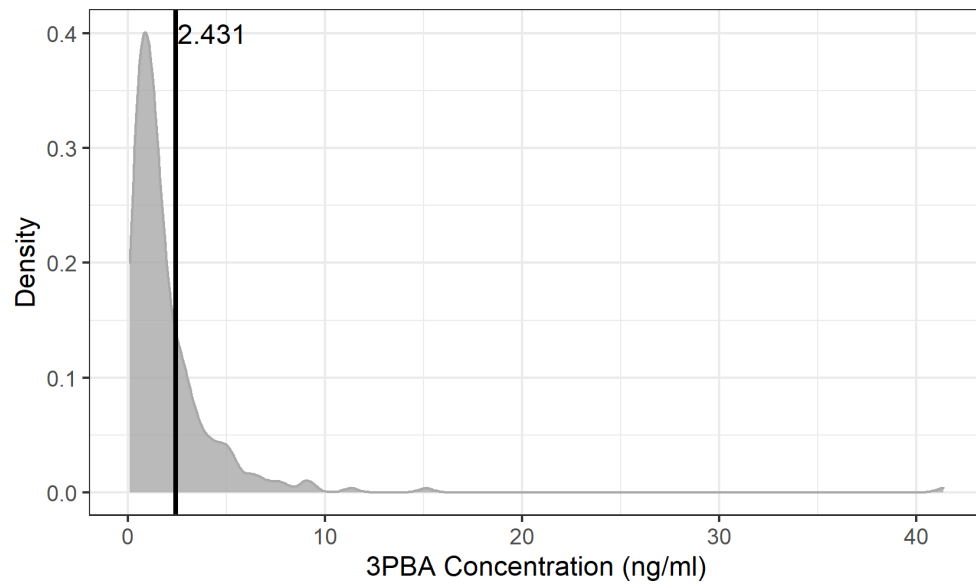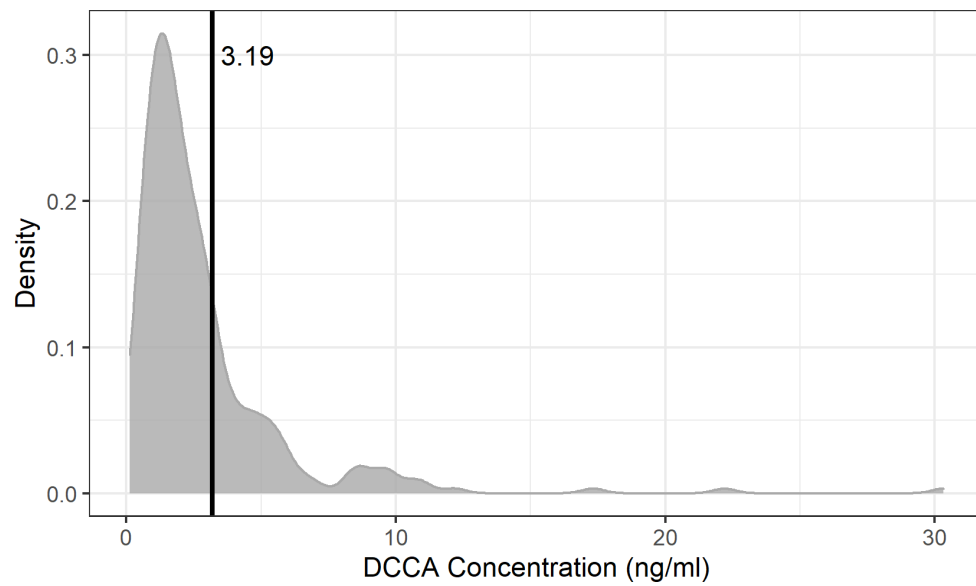

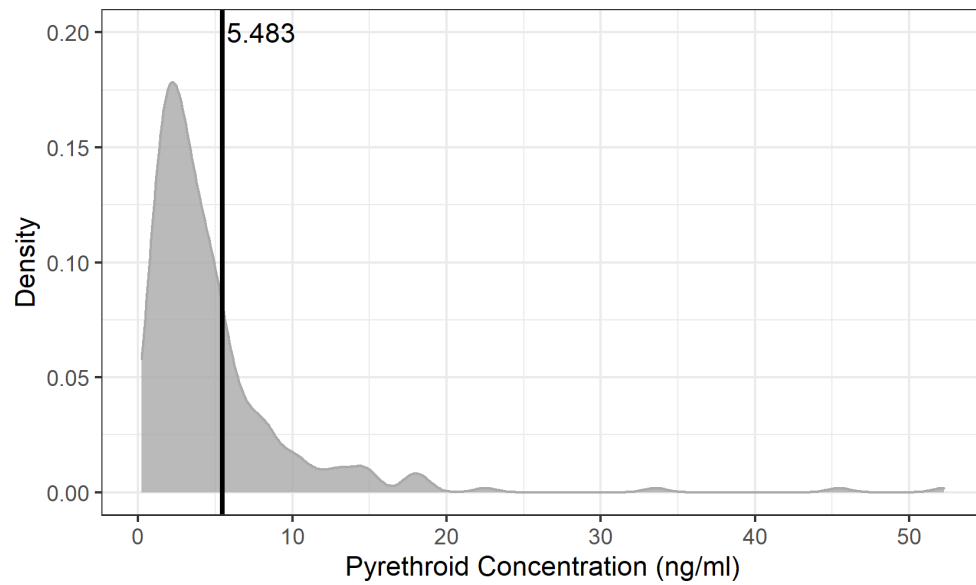

75th percentile
